# Supplementary material for: Constitutional Chromothripsis on Chromosome 2: A Rare Case with Severe Presentation
Source: Case Rep Genet. 2024 Jan 30;2024:6319030. doi: 10.1155/2024/6319030 (PMC10846923; doi:10.1155/2024/6319030)
Supplement: Supplementary Materials — Table 1: Comparison of phenotypic features of case reports with 2p25 duplication and 2q37 deletion with our patient. Figure 1: Mate pair sequencing results. [file 6319030.f1.zip]

Archive with 2 entries (2 files):
- MPSeq Results for Supplemental Figure with legend.docx
- Supplementary Table 1 (1) (1).docx
